# Supplementary material
Source: Springer Nature journal article supplement (https://www.springermedizin.de/resource/supplementary/12879_2011_2085_MOESM3_ESM.pdf/9443346)

## Lung

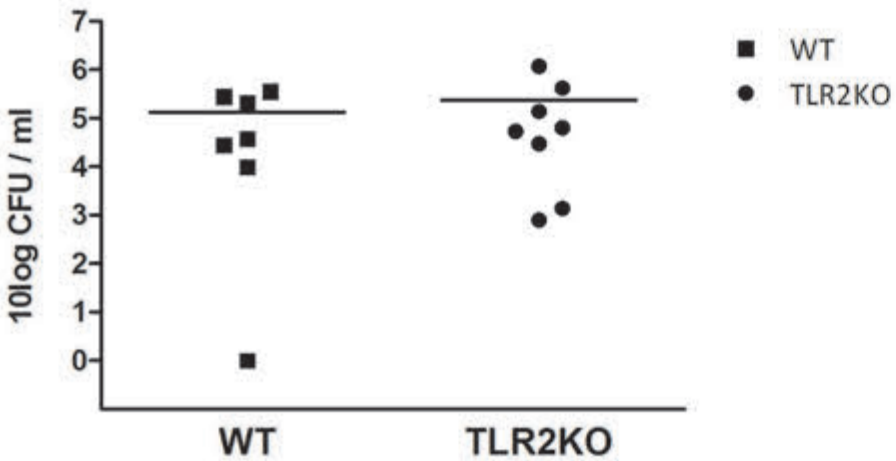

## Blood

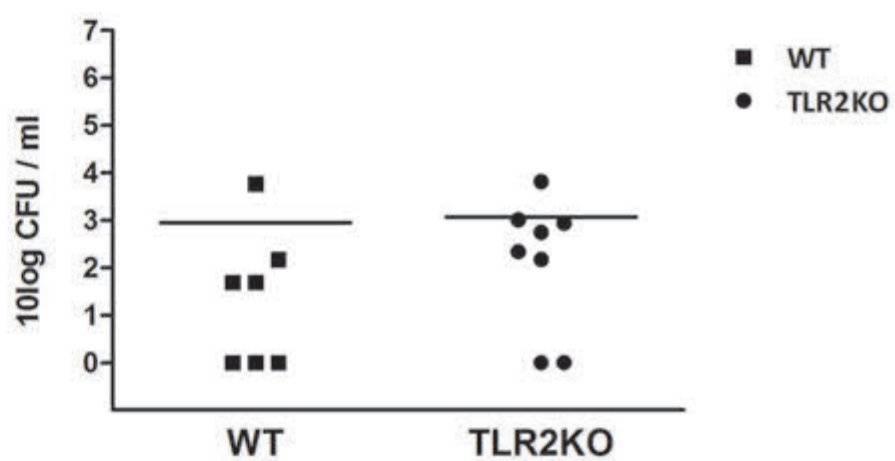

Supplement: MOESM3 [file 9443346]
